# Supplementary material for: Development of an Orodispersible Film Containing Stabilized Influenza Vaccine
Source: PubMed Central journal article supplement (PMC7150837; doi:10.3390/pharmaceutics12030245), 2020-03-08
Supplement: pharmaceutics-12-00245-s001.pdf [file pharmaceutics-12-00245-s001.pdf]

# Development of an Orodispersible Film Containing Stabilized Influenza Vaccine

Yu Tian <sup>1</sup>, Yoshita C. Bhide <sup>1,2</sup>, Herman J. Woerdenbag <sup>1</sup>, Anke L.W. Huckriede <sup>2</sup>, Henderik W. Frijlink <sup>1</sup>, Wouter L.J. Hinrichs <sup>1,\*</sup> and J. Carolina Visser <sup>1</sup>

<sup>1</sup> Department of Pharmaceutical Technology and Biopharmacy, University of Groningen, Antonius Deusinglaan 1, 9713 AV Groningen, The Netherlands; y.tian@rug.nl (Y.T.); y.c.bhide@umcg.nl (Y.C.B.); h.j.woerdenbag@rug.nl (H.J.W.); h.w.frijlink@rug.nl (H.W.F.); j.c.visser@rug.nl (J.C.V.)

<sup>2</sup> Department of Medical Microbiology and Infection Prevention, University Medical Center Groningen, University of Groningen, Antonius Deusinglaan 1, 9713 AV Groningen, The Netherlands; a.l.w.huckriede@umcg.nl

\* Correspondence: w.l.j.hinrichs@rug.nl; Tel.: +31-503-632-398

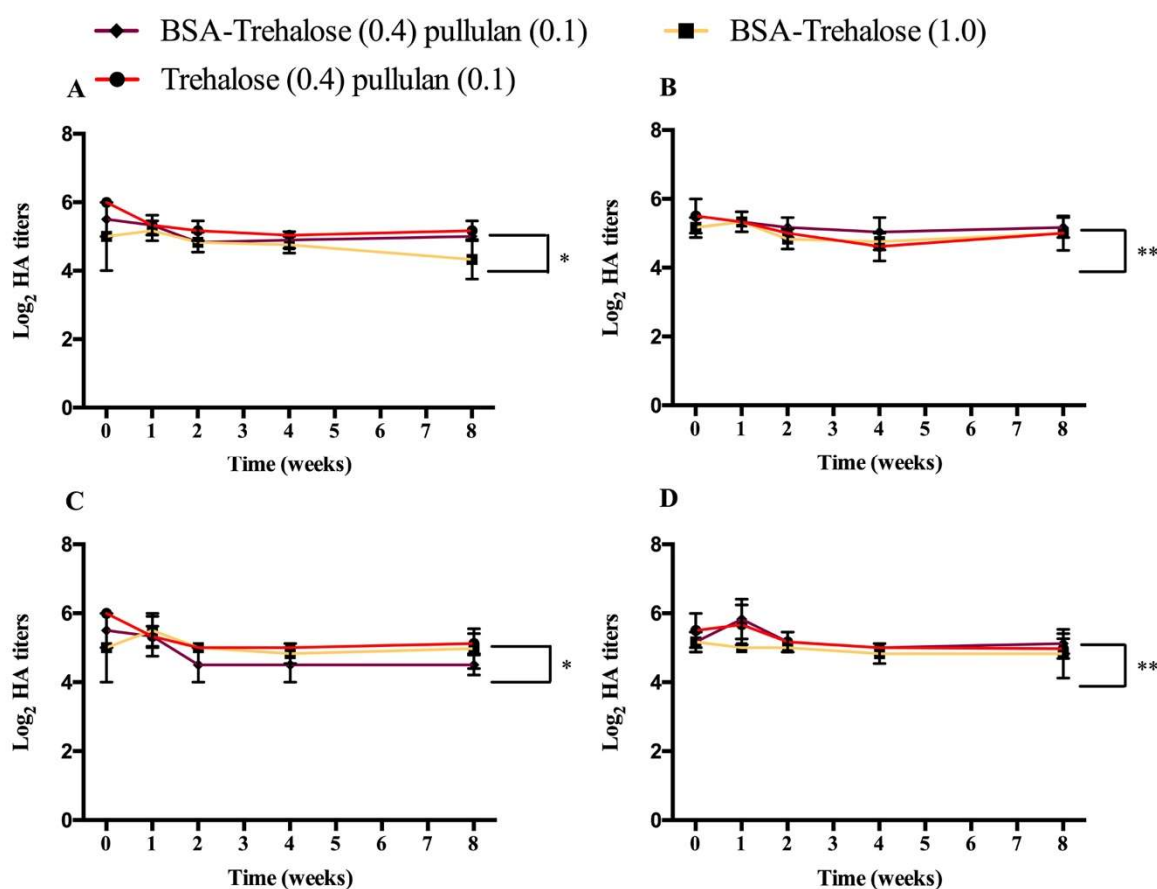

**Figure S1.** Hemagglutination titers of WIV incorporated in air- (A and C) and vacuum-dried (B and D) ODFs up to 8 weeks at 30 °C/0% RH (A and B) or 4 °C/0 % RH (C and D). Hemagglutination titers are represented as log<sub>2</sub> titers with significance indicated as \*  $p < 0.05$ . \*\*  $p < 0.01$ .
